# 1           **The stage specific plasticity of descending modulatory** 2           **controls in a rodent model of cancer induced bone pain**

3           **Mateusz Wojciech Kucharczyk** <sup>1,2,\*</sup>, **Diane Derrien** <sup>2</sup>, **Anthony Henry Dickenson**<sup>2</sup> and **Kirsty**  
4           **Bannister** <sup>1,\*</sup>

5           1    Central Modulation of Pain Group, Wolfson Centre for Age-Related Diseases, King's College London,  
6           London SE1 1UL, UK

7           2    Department of Neuroscience, Physiology and Pharmacology, University College London, Gower Street,  
8           WC1E 6BT London, UK

9           \*    Correspondence: [mateusz.kucharczyk@kcl.ac.uk](mailto:mateusz.kucharczyk@kcl.ac.uk); Tel.: +44 2078484617; Fax: +44 2078486806 (M.W.K.),  
10          Address: Wolfson Centre for Age-Related Diseases, Guy's Campus, King's College London, London, SE1  
11          1UL, UK.

## 12          **Simple Summary:**

13          The mechanisms that underlie pain resulting from metastatic bone disease remain elusive. This  
14          translates to a clinical and socioeconomic burden; targeted therapy is not possible, and patients do  
15          not receive adequate analgesic relief. Complicating matters is the heterogeneous nature of  
16          metastatic bone disease. Early stage cancers are molecularly very different to their late stage  
17          counterparts and so too is the pain associated with infant and advanced tumours. Thus, analgesic  
18          approaches should differ according to disease stage. In this article we demonstrate that a unique  
19          form of brain inhibitory control responsible for modulation of incoming pain signals at the level of the  
20          spinal cord changes with the progression of bone tumours, This corresponds with the degree of  
21          damage to the primary afferents innervating the cancerous tissue. Plasticity in the modulation of  
22          spinal neuronal activity by descending control pathways reveals a novel opportunity for targeting  
23          bone cancer pain in a stage-specific manner.

24          **Abstract:** Pain resulting from metastatic bone disease is a major unmet clinical need. Studying  
25          spinal processing in rodent models of cancer pain is desirable since the percept of pain is influenced  
26          in part by modulation at the level of the transmission system in the dorsal horn of the spinal cord.  
27          Here a rodent model of cancer induced bone pain (CIBP) was generated following syngenic rat  
28          mammary gland adenocarcinoma cell injection in the tibia of male Sprague Dawley rats. Disease  
29          progression was classified as 'early' or 'late' stage according to bone destruction. Even though  
30          wakeful CIBP rats showed progressive mechanical hypersensitivity, subsequent *in vivo*  
31          electrophysiological measurement of mechanically evoked deep dorsal horn spinal neuronal  
32          responses revealed no change. Rather, a dynamic reorganization of spinal neuronal modulation by  
33          descending controls was observed, and this was maladaptive only in the early stage of CIBP.  
34          Interestingly, this latter observation corresponded with the degree of damage to the primary  
35          afferents innervating the cancerous tissue. Plasticity in the modulation of spinal neuronal activity by  
36          descending control pathways reveals a novel opportunity for targeting CIBP in a stage-specific  
37          manner. Finally, the data herein has translational potential since the descending control pathways  
38          measured are present also in man.

39          **Keywords:** Cancer-induced bone pain (CIBP); Diffuse Noxious Inhibitory Controls (DNIC); Wide  
40          Dynamic Range Neurons; Neuronal Damage; Tibial afferents; *In vivo* electrophysiology; Mechanical  
41          hypersensitivity.

## 42          **1. Introduction**

43          The mechanisms that underlie pain resulting from bone cancer remain only partially understood.  
44          This translates to a clinical and socioeconomic burden; targeted therapy is not possible and patients  
45          do not receive adequate pain relief. Complicating matters is the heterogeneous nature of metastatic  
46          bone disease. Not only does the individual's pain phenotype depend on genetic, emotional and  
47          sensory factors, but also on the progression of the disease. Early stage cancers are very different to

48 their late stage counterparts and so too is the pain associated with infant and advanced tumours,  
49 which may be primary or metastatic.

50 Animal models of bone cancer are essential to better understand the underlying mechanisms  
51 that drive this distinct pain state. We have previously shown that injection of syngenic rat mammary  
52 gland adenocarcinoma (MRMT-1) cells in the rat tibia, which manifests a pre-clinical model of cancer  
53 induced bone pain (CIBP) [1], causes increased sensory input to the central nervous system  
54 quantified as the recruitment and activation of normally mechanically insensitive nociceptors at day  
55 14 post-injection [2]. As expected, progressive tumour burden also reflects plasticity in central (spinal)  
56 events [3–6]. However, hitherto there is a dearth of data regarding the impact of disease progression  
57 on the evoked activity of spinal cord deep dorsal horn wide dynamic range (DDH-WDR) neurons.  
58 These neurons are of interest since they form a crucial component of spinal neuronal circuits that  
59 receive sensory information from the periphery as well as modulation from descending  
60 brainstem-origin pathways. In total, their activity reflects global changes in spinal nociceptive  
61 processing.

62 Diffuse noxious inhibitory controls (DNIC) represent a unique top-down modulatory pathway that  
63 acts to endogenously reduce the percept of pain via inhibition of DDH-WDR neuronal activity [7–9].  
64 DNIC and its human counterpart conditioned pain modulation (CPM) is dysfunctional in rodent  
65 models of chronic pain and chronic pain patients respectively [9–12]. We propose that investigating  
66 the functionality of the DNIC pathway in CIBP rats is clinically relevant since pain phenotyping of  
67 patients with bone cancer pain has begun to include a measurement of CPM (ClinicalTrials.gov  
68 Identifier: NCT03908853) using a paradigm previously shown to translate between rodent and man  
69 [13].

70 It is highly likely that the mechanisms underlying the development of pain in CIBP rats are  
71 progressive and therefore representative of distinct molecular changes. We first aim to marry disease  
72 progression to behavioural readouts. Thereafter, using an *in vivo* electrophysiological approach, we  
73 will measure the evoked responses of DDH-WDR neurons. Is mechanical hypersensitivity in  
74 response to threshold and suprathreshold stimulation evidenced behaviourally and  
75 electrophysiologically, respectively? Does the top-down modulation of DDH-WDR neurons undergo  
76 dynamic maladaptive plasticity, and does this occur in a stage specific manner? Finally, we will  
77 investigate whether or not any behavioural and/or spinal changes correlate with a marker of cellular  
78 stress in those afferents that innervate the cancer-bearing tibia, this in order to link peripheral and  
79 central events.

## 80 **2. Results**

### 81 *2.1. Bone destruction in a rat model of cancer induced bone pain and early/late stage classification*

82 Following generation of a validated rat CIBP model using syngenic mammary gland carcinoma  
83 cells [1] bone damage caused by cancer growth was evaluated using a high-resolution  
84 micro-computer tomography technique ( $\mu$ CT) at two different time points: days 7/8 and days 14/15.  
85 Significant damage to the trabecular bone occurred in both stages, while cortical bone was mostly  
86 impaired at days 14/15, suggestive of early versus late stage modelling of CIBP as classified in our  
87 previous publication [2] (Fig. 1A).

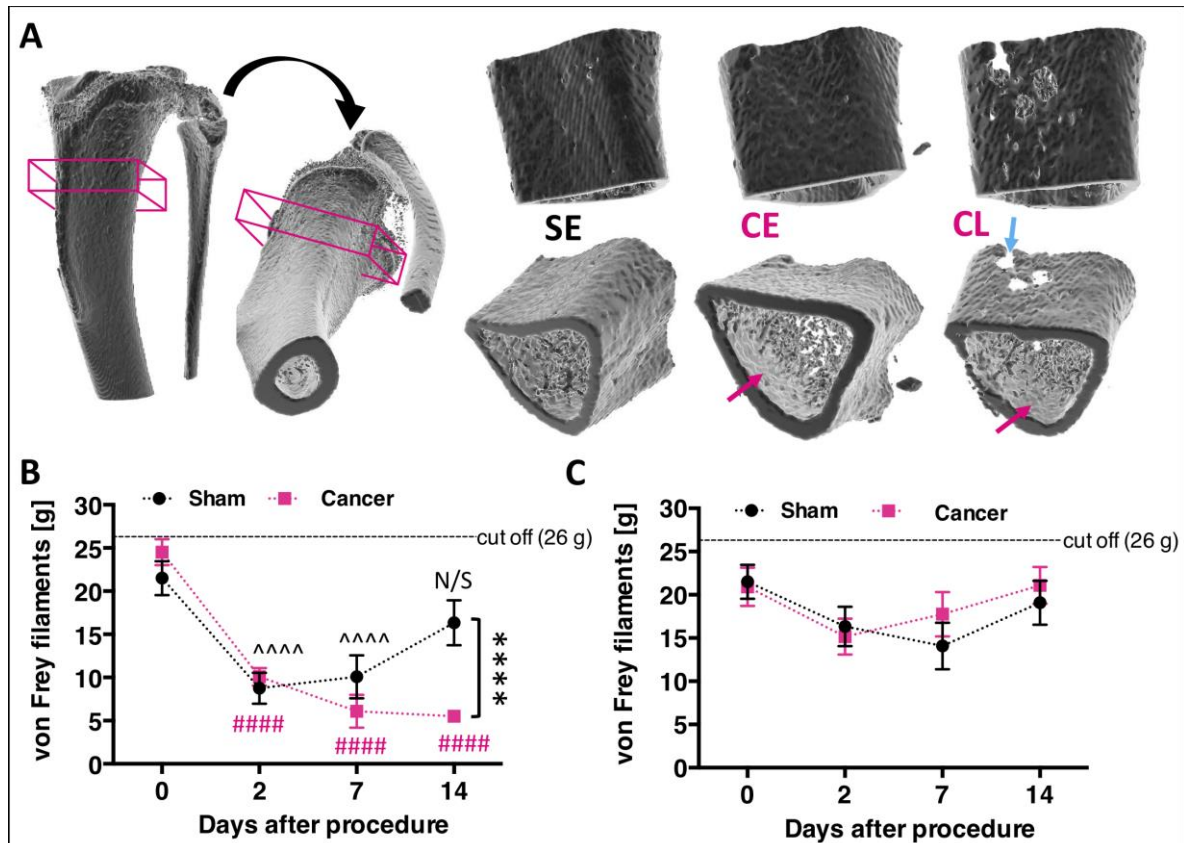

88  
 89 **Figure 1. Progressive cancer-evoked bone destruction is reflected in the development of**  
 90 **mechanical allodynia. (A)** Example microcomputer tomography 3D-rendered rat tibia with  
 91 corresponding orthogonal projections. The boxed area represents centre of the cancer-growth zone  
 92 and constitutes of 114 z-scans taken every 34  $\mu$ m. Example of the reconstructed cancer growth zone  
 93 in sham early (SE), cancer early (CE, day 7/8), and cancer late (CL, day 14/15) stages are shown.  
 94 Blue arrow points at cortical bone lesion, and red arrows point at trabecular bone lesions. See Movie  
 95 1 for 360° view. **(B)** Von Frey filaments-tested mechanical hypersensitivity progresses following bone  
 96 surgery, substantially differing from sham-operated control by the late cancer stage (Two-Way  
 97 ANOVA with Bonferroni post-hoc: ^^^Sham, ####Cancer vs. day 0,  $p < 0.0001$ . Day 14 Sham vs.  
 98 Cancer: \*\*\*\* $p < 0.0001$ ,  $n = 12$  per group). **(C)** No changes in mechanical sensitivity were observed on  
 99 the contralateral paw during the whole course of the experiment (Two-Way RM-ANOVA with  
 100 Bonferroni post-hoc,  $p > 0.05$ ,  $n = 12$  per group). Results represent mean  $\pm$  SEM.

101 **2.2. CIBP rats exhibit secondary mechanical hypersensitivity**

102 Since tumour progression is expected to relate to animal behaviour, rats were monitored up to 14  
 103 days post-surgery. While body weight gain remained stable in all groups, the behavioural data  
 104 demonstrate that CIBP rats manifest mechanical hypersensitivity. These results correspond to other  
 105 studies using similar rodent models of CIBP [1,5]. The presence of secondary mechanical  
 106 sensitization was assessed in sham operated ( $n = 12$ ) and cancer bearing ( $n = 12$ ) rats using the von  
 107 Frey test. CIBP rats exhibited mechanical allodynia on the side ipsilateral to cancer cell injection in the  
 108 late stage (from day 14 post-surgery) (Two-Way RM ANOVA [group]:  $F_{[1, 11]} = 5.263$ ,  $p = 0.0425$ , with  
 109 Bonferroni post-hoc: day 0 – day 7:  $p > 0.05$ , day 14:  $p < 0.0001$ ) (Fig. 1B). Both animal groups  
 110 experienced postsurgical pain in the week following surgery as revealed by a lowered mechanical  
 111 threshold for von Frey filaments that lasted up until day 7 (Two-Way RM ANOVA [time]:  $F_{[3, 33]} = 24.05$ ,  
 112  $p < 0.0001$ , Bonferroni post-hoc vs. day 0: Sham (day 2 and day 7):  $p < 0.0001$ , Cancer (day 2-14):  $p$   
 113  $< 0.0001$ ). No differences were detected on the contralateral sites in either analysed group (Two-Way  
 114 RM ANOVA [group]:  $F_{[1, 11]} = 0.22$ ,  $p = 0.648$ , Two-Way RM ANOVA [time]:  $F_{[3, 33]} = 3.57$ ,  $p = 0.244$ ,  
 115 Bonferroni post-hoc vs. day 0: all  $p > 0.05$ ) (Fig. 1C).

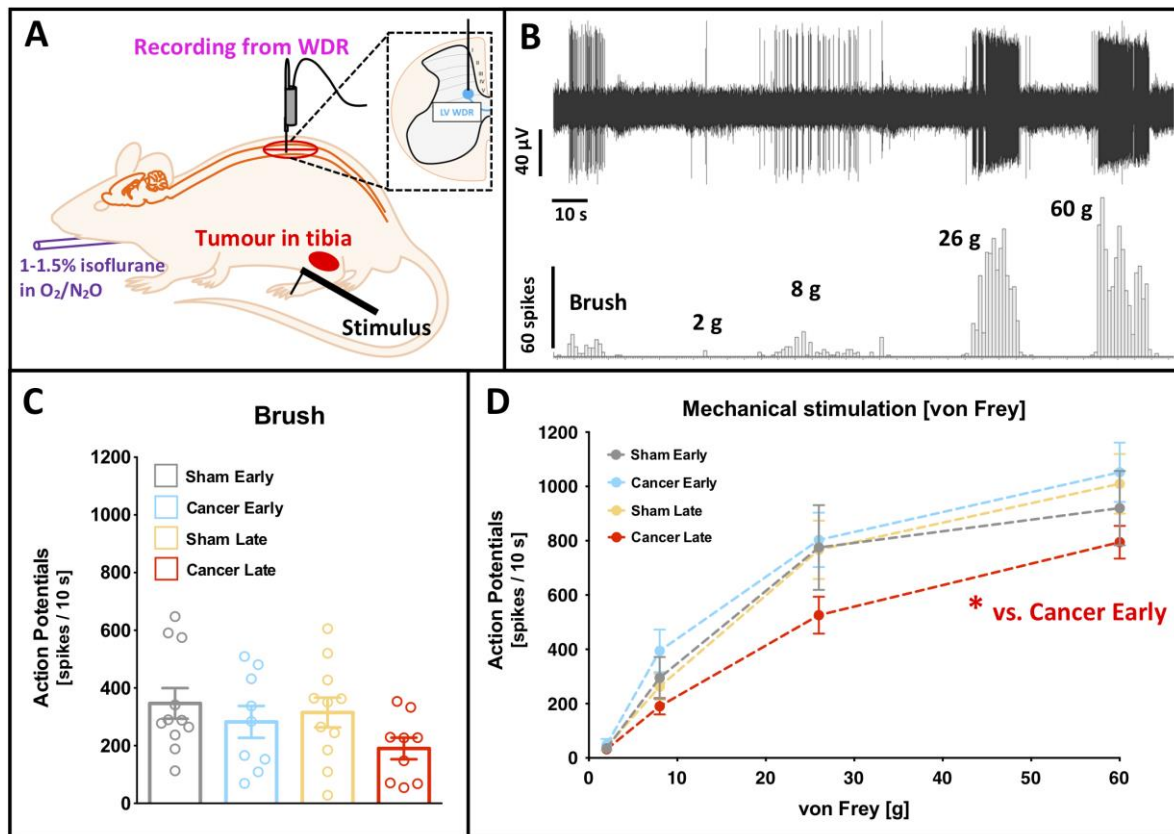

116  
117  
118  
119  
120  
121  
122  
123  
124  
125  
126  
127  
128

**Figure 2. Deep dorsal horn wide dynamic range neurons are less excitable in the late cancer stage to noxious mechanical stimuli.** (A) Schematic representation of the *in vivo* electrophysiological experiment. WDR, wide-dynamic range neurons. (B) Example of a single cell deep dorsal horn lamina V WDR neuronal responses to dynamic brushing and punctate mechanical stimulation (von Frey filaments) of the receptive field (paw ipsilateral to the cancer) in the late stage bone cancer rat. (C) Dynamic brushing-evoked responses of lamina V WDR in early (day 7-8) and late (day 14-16) cancer stage and corresponding sham-operated rats. Each dot represents one animal. One-way ANOVA with Bonferroni post-hoc:  $p > 0.05$ . (D) Von Frey-evoked responses of lamina V WDR neurons in early (day 7-8) and late (day 14-16) cancer stage and corresponding sham-operated rats. One-way ANOVA with Bonferroni post-hoc:  $*p < 0.05$  cancer early vs. cancer late. All the data represent the mean  $\pm$  SEM from sham early ( $n = 9$ ), cancer early ( $n = 11$ ), sham late ( $n = 11$ ) and cancer late ( $n = 9$ ).

129  
130

### 2.3. Deep dorsal horn wide dynamic range neurons are not hyperexcitable in CIBP rats at early or late stages

131  
132  
133  
134  
135  
136  
137  
138  
139  
140  
141  
142

The activity of DDH WDR neurons was studied in rats under light isoflurane/N<sub>2</sub>O/O<sub>2</sub> anaesthesia (slight toe pinch reflex maintained) (Fig. 2A). *In vivo* electrophysiological recordings of DDH WDR neurons were used to study von Frey and brush-evoked firing rates. An example neuronal recording is shown (Fig. 2B). Stable baseline neuronal recordings from sham early (SE,  $n = 9$ ), cancer early (CE,  $n = 11$ ), sham late (SL,  $n = 11$ ) and cancer late (CL,  $n = 9$ ) were made. One neuron was studied per animal. Animals with cancer (early or late stage) showed no significant change in the basal firing rate of WDR neurons when compared to sham-operated WDR neuronal firing rates. Dynamic brushing of the receptive field (localised typically on the paw) revealed no significant difference between all analysed groups (univariate ANOVA [group]:  $F_{3, 36} = 1.708$ ,  $p = 0.183$ ) (Fig. 2C). Analysis of variance revealed no significant changes in the basal von Frey-evoked activity (Two-Way RM ANOVA [von Frey]  $F_{[3, 108]} = 217.5$ ,  $p < 0.0001$ , [group]  $F_{[3, 36]} = 1.257$ ,  $p = 0.304$ , Bonferroni post hoc: all  $p > 0.05$ ) (Fig. 2D).

143  
144  
145

A train of 16 electrical impulses to the receptive field (localised on the hind paw toes ipsilateral to injury) was also applied to verify changes in the basal spinal coding and temporal summation. Example cumulative post-stimulus histograms generated after the delivery of 16 train stimuli from

146 cancer early and late stage rats are shown (Fig. 3A). Electrically evoked parameters: A $\beta$ - ( $F_{[3, 36]} =$   
 147 0.815,  $p = 0.494$ ), A $\delta$ - ( $F_{[3, 36]} = 0.543$ ,  $p = 0.656$ ) and C- fibre ( $F_{[3, 36]} = 3.251$ ,  $p = 0.033$ , Bonferroni  
 148 post-hoc: all  $p > 0.05$ ) evoked activity and input ( $F_{[3, 36]} = 1.112$ ,  $p = 0.357$ ) and wind-up ( $F_{[3, 36]} = 2.005$ ,  
 149  $p = 0.131$ ) were all unchanged between groups (all: univariate ANOVA [group]) (Fig. 3B).  
 150 Interestingly, post-discharge was significantly reduced in the late stage cancer animals as compared  
 151 to the early stage ones ( $F_{[3, 36]} = 3.063$ ,  $p = 0.040$ , Bonferroni post-hoc: all  $p > 0.05$  but CE vs. CL  $p =$   
 152 0.029) (Fig. 3B).

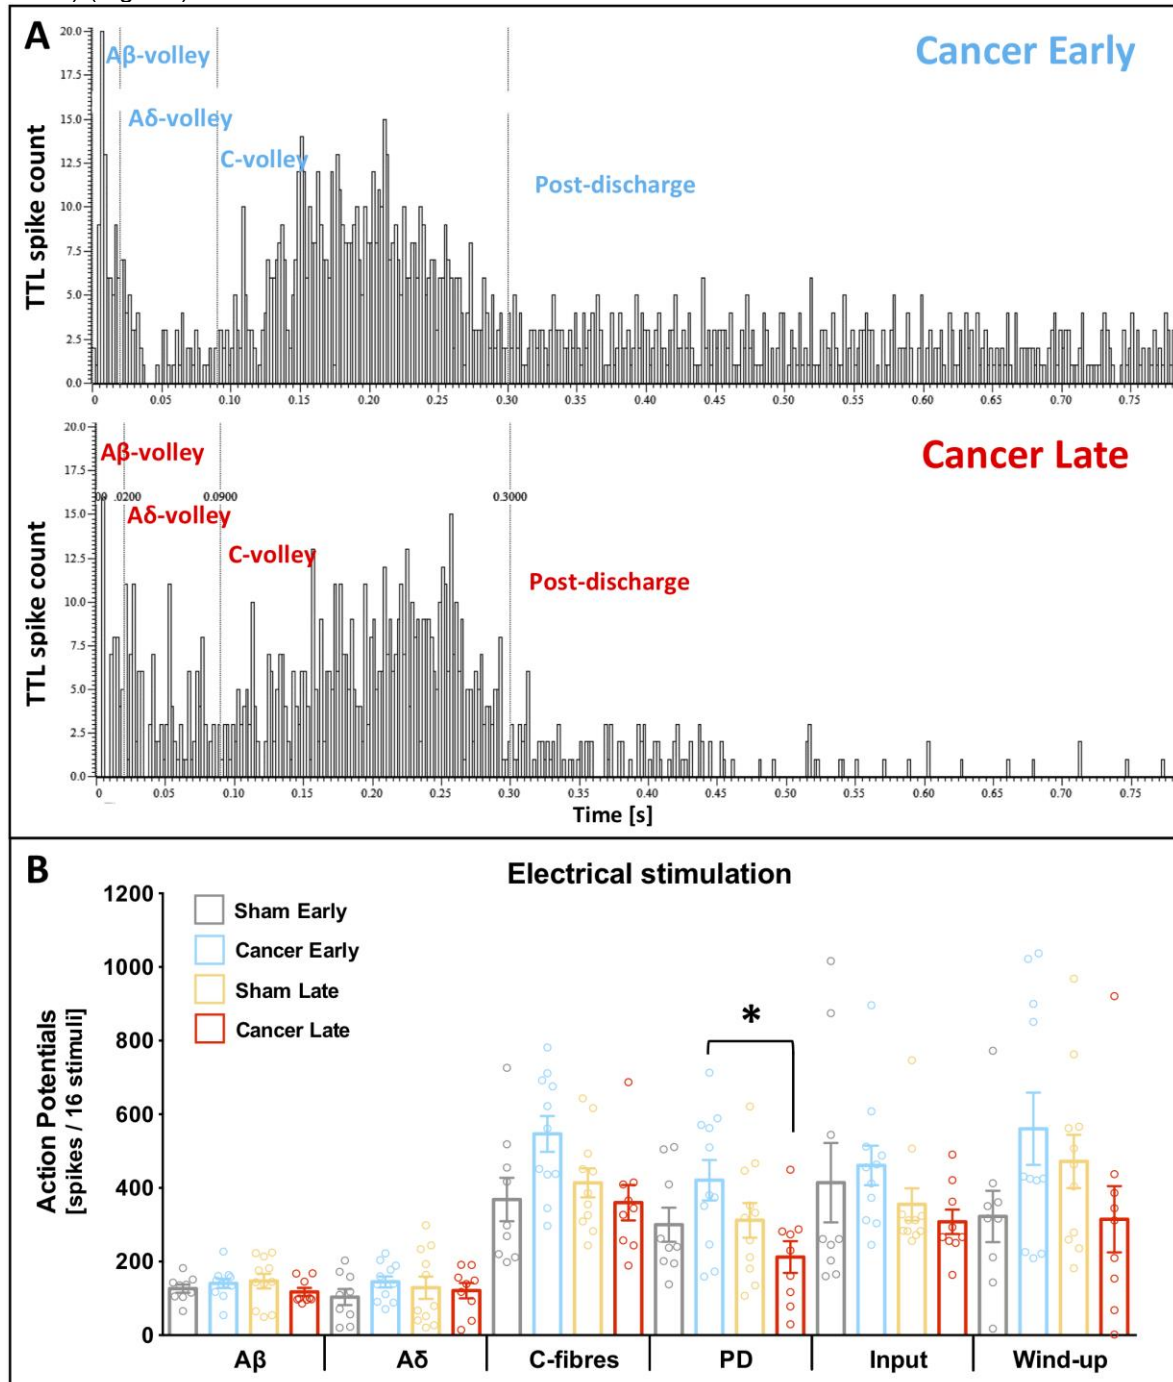

153 **Figure 3. Deep dorsal horn wide dynamic range neurons exhibit shortened post**  
 154 **discharge in the late cancer stage. (A)** Examples of the post stimulus histograms generated from a  
 155 single cell deep dorsal horn lamina V wide-dynamic range (WDR) neuronal responses recorded *in*  
 156 *in vivo* from anaesthetised cancer early (day 7/8, top panel) and late (day 14/15, bottom panel) rats.  
 157 Rats received subcutaneous injection of the current to the peripheral receptive field located on the  
 158 ipsilateral paw: train of 16 stimuli, 0.5 Hz, 2 ms pulse width,  $7.8 \pm 1.2$  mA mean current. **(B)**  
 159 Electrically-evoked responses of lamina V WDR neurons in early (day 7-8) and late (day 14-16)  
 160

161 cancer stage and corresponding sham-operated rats. Each dot represents one animal. One-way  
162 ANOVA with Bonferroni post-hoc: all  $p > 0.05$ , but post discharge (PD)  $*p < 0.05$  cancer early vs.  
163 cancer late. All the data represent the mean  $\pm$  SEM from sham early (n = 9), cancer early (n = 11),  
164 sham late (n = 11) and cancer late (n = 9).

#### 165 2.4. Diffuse noxious inhibitory controls are dysfunctional in the early, but not late, stage of disease

166 Previous research has shown that descending modulation of DDH-WDR neurons by the  
167 inhibitory DNIC pathway is compromised in rodent models of nerve injury and inflammation [9,10]. In  
168 the present study, despite the manifestation of behavioural hypersensitivity, the baseline  
169 evoked-activity of DDH-WDR neurons was comparable between sham operated and cancer rats.  
170 Therefore, we sought to investigate whether or not descending modulation of those same neurons  
171 was dysfunctional during disease progression. DNIC expression was studied in the four  
172 aforementioned experimental groups under light isoflurane/N<sub>2</sub>O/O<sub>2</sub> anaesthesia (slight toe pinch  
173 reflex maintained). Terminal electrophysiological recordings of DDH WDR neurons were used to  
174 study the von Frey-evoked firing rate changes upon simultaneous ipsilateral application of noxious  
175 conditioning stimulus (ear pinch) to evoke DNIC (Fig. 4A). One neuron was studied per animal. DNIC  
176 were expressed in SE, SL and CL animals, resulting in around 50%, 40% and 30% inhibition of the  
177 evoked action potentials to 8 g, 26 g and 60 g von Frey application, respectively (Two-Way RM  
178 ANOVA [von Frey]  $F_{[2, 72]} = 6.887$ ,  $p = 0.0018$ ) (Fig. 4B). Interestingly, DNIC expression was impaired  
179 in CE rats (Two-Way RM ANOVA [group]  $F_{[3, 36]} = 34.66$ ,  $p < 0.0001$ , Bonferroni post hoc: [8 g] CE vs.  
180 all  $p < 0.0001$ , [26 g] CE vs. all  $p < 0.0001$ , [60 g] CE vs. SE and SL  $p < 0.01$ , CE vs. CL  $p < 0.0001$ )  
181 (Fig. 4B).

182 In SE animals, DDH WDR neuronal activity was significantly inhibited after ear-pinch when  
183 compared to baseline for all von Frey filaments (RM ANOVA:  $F_{[3, 6]} = 7.669$ ,  $p = 0.018$ ; Bonferroni post  
184 hoc [8 g]  $p = 0.019$ , [26 g]  $p = 0.003$ , [60 g]  $p = 0.001$ ) (Fig. 4C). In contrast, DDH WDR neuronal  
185 responses in CE rats were not inhibited (RM ANOVA:  $F_{[3, 8]} = 2.606$ ,  $p = 0.124$ ) (Fig. 4D). In SL rats  
186 DNIC was expressed (RM ANOVA:  $F_{[3, 8]} = 13.766$ ,  $p = 0.002$ ; Bonferroni post hoc [8 g]  $p = 0.004$ , [26  
187 g]  $p = 0.000047$ , [60 g]  $p = 0.00106$ ) (Fig. 4E), as well as in CL animals (RM ANOVA:  $F_{[3, 6]} = 37.513$ ,  
188  $p = 0.00028$ ; Bonferroni post hoc [8 g]  $p = 0.001872$ , [26 g]  $p = 0.000204$ , [60 g]  $p = 0.000004$ ) (Fig.  
189 4F).

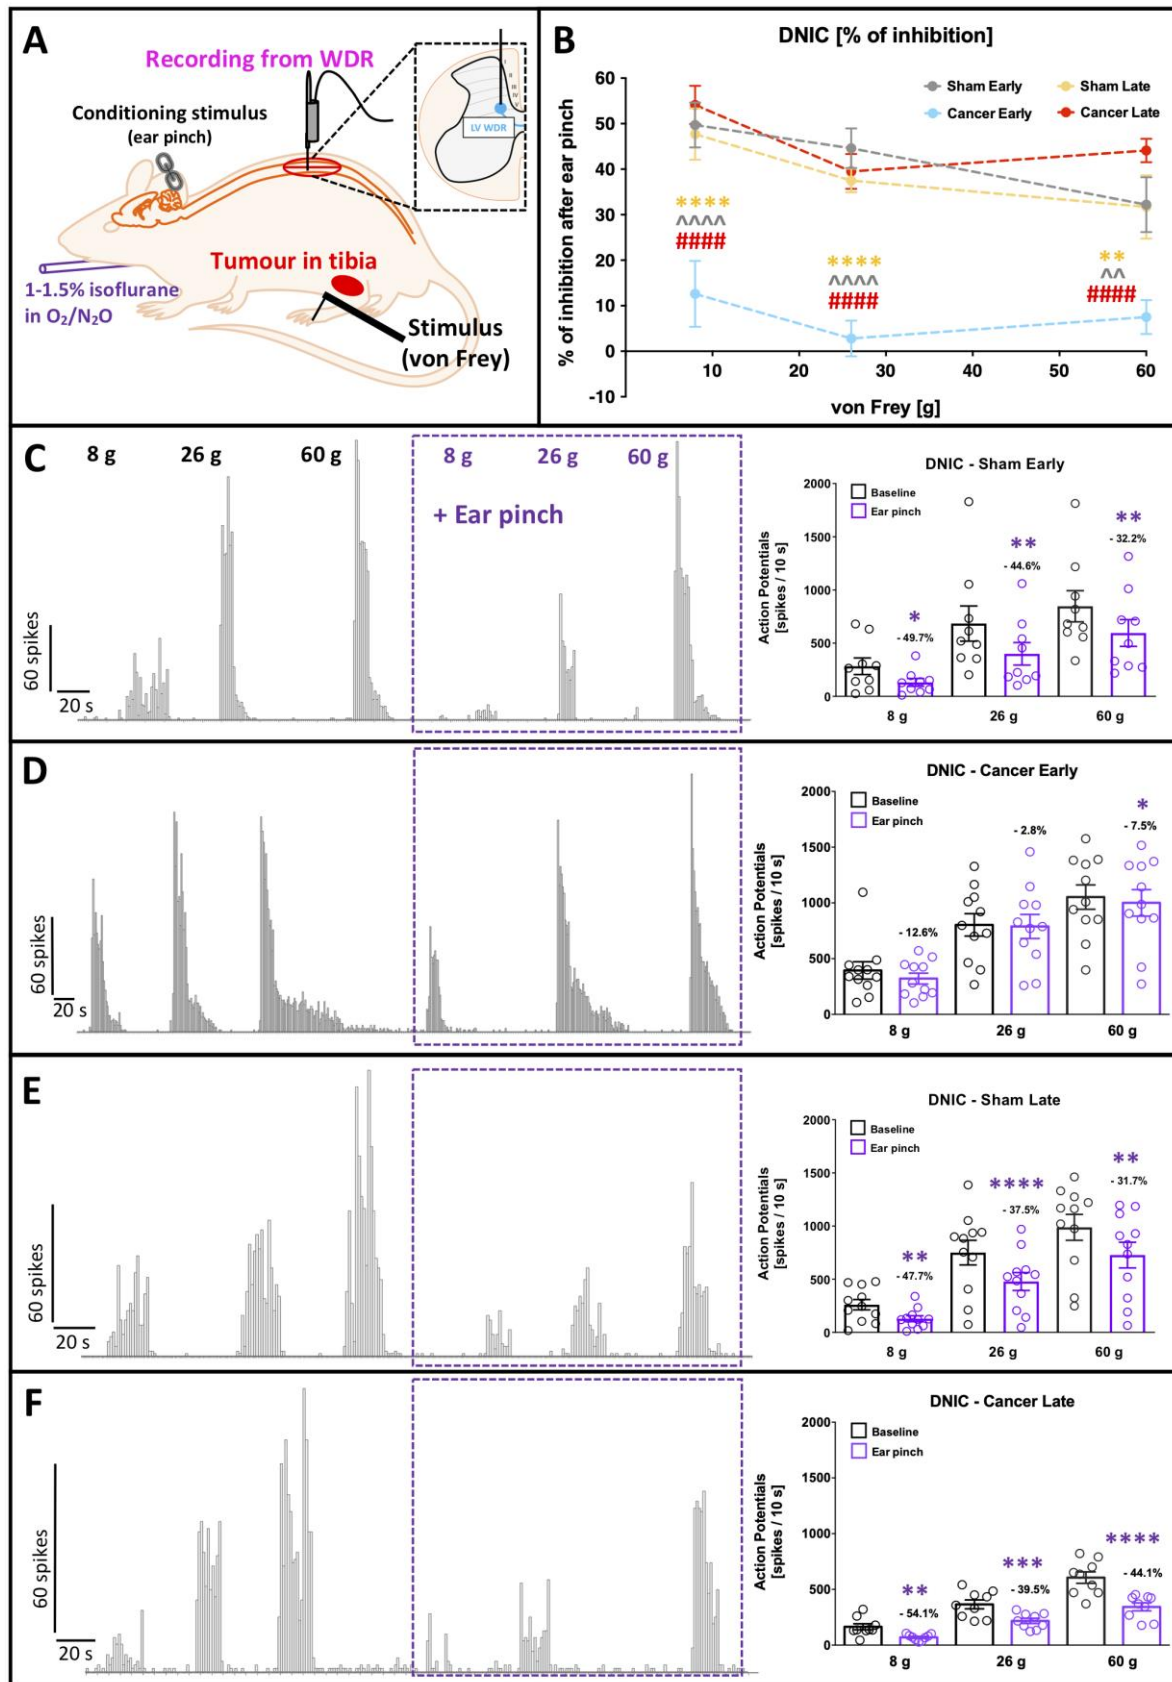

190  
191  
192  
193  
194  
195  
196

**Figure 4. Diffuse noxious inhibitory controls expression is compromised in early but not in the late cancer stage. (A)** Schematic representation of the *in vivo* electrophysiological experiment. WDR, wide-dynamic range neurons. Activation of diffuse noxious inhibitory controls (DNIC) is quantified as a decrease in von Frey-evoked spinal WDR neuronal firing before (baseline; testing stimulus) and after concomitant application of noxious ear-pinch (DNIC; conditioning stimulus). **(B)** Magnitude of DNIC expression quantified as a percentage of WDR neuron inhibition

197 following ear-pinch application in early (day 7-8) and late (day 14-16) cancer stage and corresponding  
198 sham-operated rats. One-way ANOVA with Bonferroni post-hoc: \*\*\*\* $p < 0.0001$  cancer early vs. all  
199 other groups. **(C-F)** Example of deep WDR neuron responses to increasing bending force of von Frey  
200 filaments before and after ear pinch application in sham early **(C)**, cancer early **(D)**, sham late **(E)** and  
201 cancer late **(F)**. Individual neuronal responses are quantified in the right panel. Values over each bar  
202 represent percentage of change to the respective baseline. Each cell values represent averaged  
203 responses from 3 consecutive trials and one cell was recorded per animal (shown as a single dot).  
204 2-way RM-ANOVA with Bonferroni post-hoc: \* $p < 0.05$ , \*\* $p < 0.01$ , \*\*\* $p < 0.001$ , \*\*\*\* $p < 0.0001$  vs.  
205 corresponding baseline. All the data represent the mean  $\pm$  SEM from sham early ( $n = 9$ ), cancer early  
206 ( $n = 11$ ), sham late ( $n = 11$ ) and cancer late ( $n = 9$ ).

## 207 2.5. *Damage to primary afferents innervating the cancerous tissue was evident in early but not late* 208 *stage CIBP rats*

209 Based on our fast blue (FB) tracing, the rat tibia is innervated by  $100.7 \pm 15.7$  lumbar 2-5 DRG  
210 neurons, which corresponds to  $4.47 \pm 0.34\%$  of all neurons (based on Tubulin- $\beta$ III positivity) therein.  
211 In health, the majority of those tibia-projecting cells are located within the L3 DRG (Fig. S1A, and  
212 [16]).

213 Damage to afferents innervating cancerous tissue was quantifiable using activating transcription  
214 factor 3 (Atf3), a protein induced by cellular stress [17]. Representative micrographs of the L3 DRG  
215 ipsilateral to the injury site clearly demonstrated the characteristic nuclear expression pattern of Atf3  
216 in bone and other afferents (Fig. 5A). This is especially evident in early stages of our CIBP model (Fig.  
217 5A, B). Interestingly, by the late stage, Atf3 positivity normalises in both groups, with almost no  
218 occurrence in late-stage sham animals, suggesting full postsurgical recovery (One Way ANOVA  
219 [group]:  $F_{[3, 8]} = 17.29$ ,  $p = 0.0007$ , Tukey post-hoc: CE vs. SL  $p < 0.001$ , CE vs. CL  $p < 0.01$ , SL vs. SE  
220  $p < 0.01$ ) (Fig. 5B, S1B). Bone afferents are more likely than other afferents to express Atf3 at early  
221 disease stages, suggesting higher levels of stress in this population (One Way ANOVA [group]:  $F_{[3, 8]}$   
222  $= 10.52$ ,  $p = 0.0038$ , Tukey post-hoc: SE vs. CE  $p < 0.01$ , CE vs. SL  $p < 0.01$ , CE vs. CL  $p < 0.05$ ) (Fig.  
223 5C). Moreover, there is a visible shift in the expression pattern of Atf3+/FB+ from L3 to L4 DRG  
224 between early and late CIBP (Fig. S1C).

225 Interestingly, no changes were observed in the total number of FB+ neurons between groups  
226 when DRG were pooled (One Way ANOVA [group]:  $F_{[3, 8]} = 3.69$ ,  $p = 0.0062$ ) (Fig. 5D), however, there  
227 was a shift in tibial innervation from L3 to L4 DRG in cancer-bearing rats (One Way ANOVA [group]:  
228 L3 DRG:  $F_{[3, 8]} = 7.065$ ,  $p = 0.0012$ , Tukey post-hoc: CE vs. SE  $p < 0.05$ , CL vs. SL  $p < 0.05$ , L4 DRG:  
229  $F_{[3, 8]} = 9.01$ ,  $p = 0.0061$ , Tukey post-hoc: CE vs. SE  $p < 0.05$ , CL vs. SL  $p < 0.05$ , CL vs. SE  $p < 0.01$ )  
230 (Fig. 5E, 5F, S1A). Such a shift is suggestive of either degenerative changes in the L3 DRG afferents  
231 and/or sprouting of the L4 DRG afferents towards the tumour mass, and/or leakage of the FB tracer  
232 outside the bone cavity via cancer-induced perforations of the cortical bone.



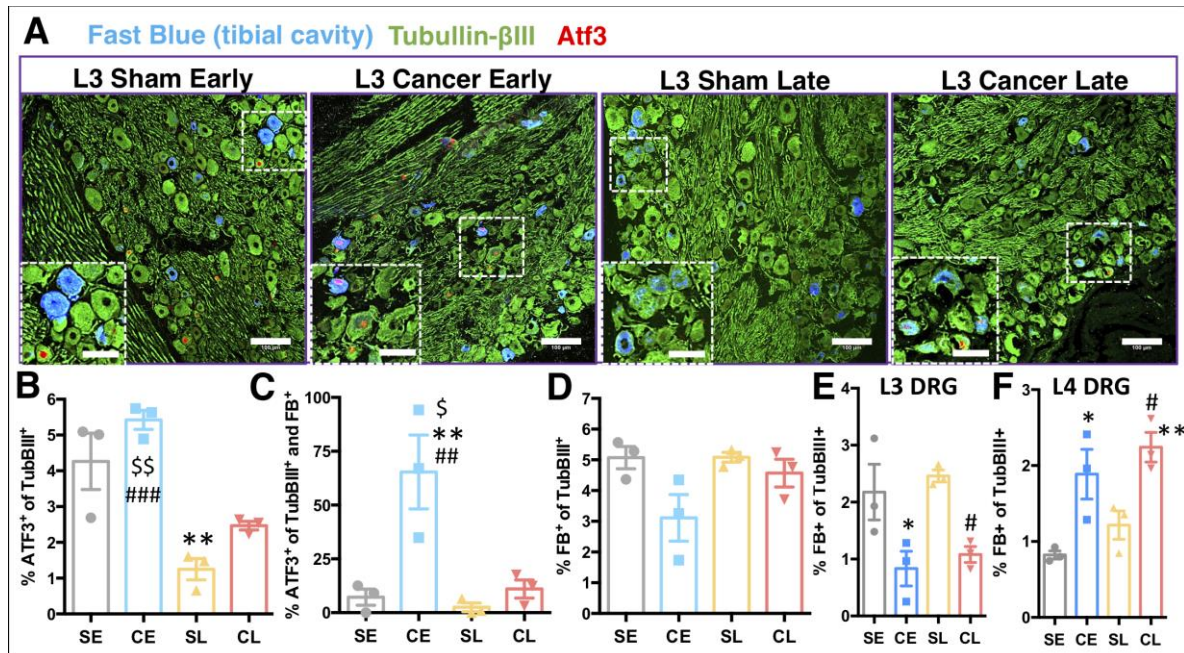

233  
234  
235  
236  
237  
238  
239  
240  
241  
242  
243  
244  
245  
246  
247  
248  
249  
250

**Figure 5. Cancer progression affects bone innervation. (A)** Representative confocal scans selected from lumbar 3 DRG of immunohistochemical analysis of cellular stress factor Atf3 and Tubullin-βIII protein expression in the Fast Blue (FB) traced tibial afferents. FB was injected a week before the cancer cells or vehicle (sham) implantation. Main scale bars are 100 μm, and zoomed inclusions' scale bars are 50 μm. **(B)** Quantification of all Atf3<sup>+</sup> afferents within ipsilateral L2-5 DRG, analysed as a percentage of all neurons (Tubullin-βIII) therein in cancer early (CE, day 7/8) and cancer late (CL, day 14/15) stage groups with corresponding sham groups (early – SE and late – SL). On average 4-20 10 μm sections were counted per DRG. Data represent the mean ± SEM and each dot represent a separate animal (n = 3). One Way ANOVA with Tukey post-hoc test. \* vs. SE, # vs. SL, \$ vs. CL. \*p < 0.05, \*\*p < 0.01, \*\*\*p < 0.001. **(C)** Quantification of Atf3<sup>+</sup> afferents within ipsilateral L2-5 DRG analysed as a percentage of all FB traced neurons. Analysed as in **(B)**. **(D)** Total number of FB traced neurons within ipsilateral L2-5 DRG analysed as a percentage of all neurons (Tubullin-βIII) therein. On average 100.6 ± 15.7 L2-5 DRG neurons innervate tibia. No FB positivity was noticed in the contralateral lumbar DRG (not shown). **(E)** Total number of FB traced neurons in the ipsilateral L3 DRG analysed as a percentage of all neurons (Tubullin-βIII) therein. Analysed as in **(B)**. **(F)** Total number of FB traced neurons in the ipsilateral L4 DRG analysed as a percentage of all neurons (Tubullin-βIII) therein. Analysed as in **(B)**. See also **Figure S1** for detailed analysis.

### 251 3. Discussion

252 In the present study neuronal activity in the deep dorsal horn of the spinal cord of male Sprague  
253 Dawley CIBP rats was investigated. Disease progression was classified as early (day 7-8 post  
254 MRMT-1 cells injection) or late (day 14-16) stage according to trabecular and cortical bone  
255 destruction. Despite the fact that, upon stimulation of the hind paw, wakeful CIBP rats demonstrated  
256 ipsilateral mechanical hyperalgesia in the early stage and mechanical allodynia in the late stage of  
257 disease (suggestive of central sensitization), deep dorsal horn wide dynamic range (DDH WDR)  
258 neuronal firing upon mechanical stimulation of the same hind paw was unchanged when measured  
259 using *in vivo* electrophysiological techniques. This result was unexpected not only due to the  
260 mismatch between behavioural and electrophysiological outcomes but also because spinal cord  
261 superficial lamina I neurons were previously consistently described as hyperactive in the CIBP model  
262 [3–5,18,19]. The divergence in responsiveness of superficial versus DDH WDR neurons could be  
263 partly explained based on the anatomy of primary afferents. Lamina I neurons receive direct input  
264 from Aδ- and C-fibres as well as silent nociceptors [20]. These afferents predominantly innervate  
265 tibiae [2,20–23]. In contrast, DDH WDR neurons receive direct inputs from large Aβ- and small  
266 Aδ-myelinated fibres and indirect polysynaptic inputs from C-fibres from distal dendrites that extend  
267 into superficial laminae [24]. The internal spinal circuitry is highly plastic and hugely heterogeneous

268 [25], and the disease state may lead to dysfunctionality in transmission circuits that include inhibitory  
269 mechanisms [26], leading to a knock on 'adaptive' effect on the evoked activity of DDH WDR neurons  
270 as observed in the present study.

271 The superficial dorsal horn is the origin of a spino-bulbo-spinal loop and prior investigation of  
272 potential alterations in descending modulatory controls was conducted. Rodriguez et al. showed that  
273 in CIBP rats both superficial and DDH WDR neurons undergo ongoing facilitatory control (mediated  
274 by spinal 5-HT<sub>3</sub> receptors), suggestive of an enhanced descending serotonergic drive [4]. Our  
275 observation that DDH WDR neurons are not hyperexcitable in the CIBP model could indicate  
276 plasticity in ongoing (tonic) inhibitory controls.

277 Multiple descending inhibitory control pathways exist and activation of one such pathway, diffuse  
278 noxious inhibitory controls (DNIC), gives rise to the 'pain inhibits pain' phenomenon, whereby  
279 application of a noxious stimulus to one part of the body inhibits pain perception in a remote body  
280 region. DNIC inhibitory controls are largely driven by  $\alpha_2$ -adrenergic receptor ( $\alpha_2$ -AR)-mediated  
281 responses to inhibit the activity of DDH WDR neurons [9]. Notably during our *in vivo* spinal  
282 electrophysiology studies, we observed a dynamic reorganization of descending inhibitory controls  
283 during progression of the bone tumour, quantified as dysfunctional expression of DNIC. Intriguingly,  
284 DNIC was abolished only in the early stages of the disease and they were functionally expressed  
285 once again in the late stage of CIBP. The dynamic reorganization of spinal neuronal modulation by  
286 descending controls corresponds with prior research demonstrating that facilitatory descending  
287 controls are altered in CIBP rats [4].

288 The translational potential of the current study may be considered when discussing the  
289 expression of an equivalent naturally occurring analgesic pathway in man, which is measured using  
290 the human psychophysical paradigm conditioned pain modulation (CPM; [27]). Pharmacotherapies  
291 that act to enhance the descending inhibitory pathways whose functionality is assessed with CPM  
292 psychophysics have already shown promise in enabling chronic pain patients to harness their  
293 endogenous pain-relieving mechanisms and thus reduce their pain experience [12]. The presence or  
294 absence of CPM is proposed to be a reliable, simple diagnostic measure in terms of personalised  
295 pain pharmacotherapies in particular pain types. Recently, several clinical paradigms have been  
296 developed for a quantification of the inhibitory impact of CPM [28]. Analogically to DNIC, CPM is  
297 pan-modal and it requires test and conditioning stimulus [29] and the conditioning stimulus must be  
298 noxious [11]. Recently, a novel approach utilises two pressure cuffs controlled by a fully automated  
299 algometer [30] and there is evidence that a comparable noxious pressure paradigm activates the  
300 unique endogenous inhibitory control pathway in rat and man [13].

301 Abolished DNIC expression in the early stage CIBP rats could serve as an early indicator of the  
302 bone cancer pain phenotype development; pushing the story further, it indicates that the expression  
303 status of this unique naturally occurring descending-inhibitory pathway could perhaps be used  
304 clinically as a diagnostic tool to tailor pain pharmacotherapy in patients suffering from (metastatic)  
305 bone cancer. This type of research, the coupling of preclinical and clinical observations, has the  
306 potential to identify new analgesic targets. For example, pain therapies utilising  
307 noradrenaline-reuptake inhibitors in the early cancer phase, which has diminished DNIC expression,  
308 could be therapeutically advantageous as observed in other chronicities where endogenous pain  
309 inhibitory pathways are otherwise dysfunctional [12]. Interestingly, CIBP is not the only pain state  
310 where dynamics in descending controls sub-serving DNIC/CPM have been recorded. CPM is not  
311 expressed in patients with cluster headache in the active phase, and yet is restored in remission [31].

312 The sensitization of primary afferent fibres that innervate cancer-bearing bones in the early stage  
313 of disease [2,16,32–35] was linked in the present study with a high expression of cellular stress  
314 marker activating transcription factor 3 (Atf3). In the late cancer stage, the activation of Atf3 appeared  
315 completely resolved in line with the resolution of DNIC functionality. Multiple mechanisms may  
316 contribute to the reduction of Atf3 in the late stages of cancer. For example, it is possible that CIBP  
317 afferents are undergoing cell death as a result of tumour invasion and toxic local conditions.  
318 Supporting this hypothesis is an observed shift in the expression pattern of Atf3+/FB+ from L3 to L4  
319 DRG between early and late CIBP, further indicating the presence of a degenerative mechanism in L3  
320 tibial afferents, and consecutive sprouting and/or activation of L4 afferents. Indeed, the number of L3  
321 afferents decreases in the cancer groups, as compared to the corresponding sham controls.

322 Over the past decade, studies of CIBP have revealed that neurons and cancer cells are engaged  
323 in bi-directional crosstalk. For instance, cancer causes a reorganization of 'normal' anatomy, driving  
324 neurons to sprout and more densely innervate the tumour-bearing bone [36–38]. This sprouting  
325 process was shown to be mediated via tyrosine kinase A (TrkA) receptor activation by nerve growth  
326 factor (NGF) released from both cancer and stromal cells [39–41]. Conversely, neurons release  
327 factors which support tumour growth and vascularization [42–44]. This complex dialogue involves  
328 numerous mediators and different local cells, including fibroblasts, osteoclasts and newly recruited  
329 immune cells [43,45].

330 Our previously published research revealed important new information about bone afferent  
331 expression patterns, including the fact that they encode mechanical stimuli. Thus, we provided a  
332 potential functional mechanism explaining the recruitment of additional afferents from the outside of  
333 the tibial cavity that could contribute to the CIBP phenotype. Interestingly, in the presence of the  
334 tumour, tibial cavity afferents were not hyperexcitable, a result that was recently confirmed by an  
335 independent study on murine model of CIBP, where femur cavity neurons were not sensitised by the  
336 presence of Lewis lung carcinoma tumours after both intraosseous pressure and acid stimulation  
337 [32].

338 In the current study, FB traced tibial cavity neurons were not sensitised in the late stage cancer,  
339 which corresponds to the normalised Atf3 level in this group. A decrease in Atf3 levels in the late  
340 stage cancer group may, together with the lack of hyperexcitability in this group [2], suggest an  
341 ongoing tumour-induced neurodegenerative change in this neuronal population. Supporting this  
342 hypothesis, there is a decrease in the total count of FB positive neurons in the L3 DRG in cancer  
343 groups as compared to the sham-operated ones, pointing at an ongoing cellular death of this  
344 population. A subsequent increase in the number of FB L4 neurons in the cancer groups may result  
345 from either neuronal sprouting of the L4 afferents towards the tumour mass (NGF induced:  
346 [36,40,46]) and/or leakage of the FB tracer via cancer-induced perforations in the cortical bone or  
347 internal bone compartments resulting in labelling of additional L4 afferents. In fact, since in rats L3  
348 DRG neurons innervate predominantly the medullary cavity and periosteum, and L4 DRG cells  
349 innervate epiphysis and since the distal epiphysis and the medullary cavity are not in continuity [23],  
350 it is likely that in our model cancer-evoked erosion of the medullary cavity towards the epiphysis would  
351 result in labelling of additional L4 afferents. It remains to be established whether the long bones CIBP  
352 phenotype differs depending on in which bone compartment the tumour grows, i.e. would the CIBP  
353 phenotype differ if the tumour invaded the epiphysis to the point where the tumour encompassed the  
354 medullary cavity or periosteum?

355 It is likely that peripheral hyperactivity drives plasticity in central pain controls, a view supported  
356 by the aforementioned study demonstrating an increase in descending facilitatory controls  
357 (orchestrated via spinal 5HT<sub>3</sub> receptors) in the CIBP rat dorsal horn neuronal activity [4]. Taking this  
358 further, some clusters of primary afferents are modality specific, which superimposes the existence of  
359 different synapses on the central (spinal) sites [25,47,48]. Further, the action of descending  
360 monoamines (released from the terminals of the descending modulatory pathways investigated) in  
361 the cord is rather diffuse, allowing for a broad (inhibitory or excitatory) control of multiple modalities  
362 [49–51].

363 CIBP is unique in that the sufferers experience tonic and spontaneous pain as well as the type of  
364 mechanically-evoked pain studied here. Probing the descending modulatory control of spinal  
365 neuronal activity should ultimately include all three types of pain. Background (tonic) pain intensity  
366 typically increases with the progression of the disease while spontaneous and movement-evoked  
367 types of pain being mechanoceptive in nature are difficult to manage in mobile subjects; by definition,  
368 they 'break-through' the barriers of analgesia [45]. Since they are also unpredictable, it is extremely  
369 challenging to suit sufficient therapies without adverse effects of high doses of painkillers being  
370 continuously administered. Such mechanistic studies were beyond the scope of this paper, but we  
371 are aware of these challenges that face preclinical researchers who investigate mechanisms of CIBP.

## 372 **4. Materials and Methods**

### 373 *4.1. Cell lines*

374 Syngeneic rat mammary gland adenocarcinoma cells (MRMT-1, Riken cell bank, Tsukuba,  
375 Japan) isolated from female Sprague-Dawley rat, were cultured in RPMI-1640 medium (Invitrogen,  
376 Paisley, UK) supplemented with 10% FBS, 1% L-glutamine and 2% penicillin/streptomycin  
377 (Invitrogen, Paisley, UK). All cells were incubated at 5% CO<sub>2</sub> in a humidity-controlled environment  
378 (37°C, 5% CO<sub>2</sub>; Forma Scientific).

#### 379 4.2. Animals

380 Male Sprague-Dawley rats (UCL Biological Services, London, UK or Charles-River, UK) were  
381 used for experiments. Animals were group housed on a 12:12-hour light–dark cycle. Food and water  
382 were available ad libitum. Animal house conditions were strictly controlled, maintaining stable levels  
383 of humidity (40-50%) and temperature (22±2°C). All procedures described were approved by the  
384 Home Office and adhered to the Animals (Scientific Procedures) Act 1986. Every effort was made to  
385 reduce animal suffering and the number of animals used in accordance with IASP ethical guidelines  
386 [14].

#### 387 4.3. Cancer-induced bone pain model

388 On the day of surgery, MRMT-1 cells were released by brief exposure to 0.1% w/v  
389 trypsin-ethylenediaminetetraacetic acid (EDTA) and collected by centrifugation in medium for 5 min at  
390 1000 rpm. The pellet was washed with Hanks' balanced salt solution (HBSS) without calcium,  
391 magnesium or phenol red (Invitrogen, Paisley, UK) and centrifuged for 5 min at 1000 rpm. MRMT1  
392 cells were suspended in HBSS to a final concentration of 300,000 cells/ml and kept on ice until use.  
393 Only live cells were counted with the aid of Trypan Blue (Sigma) staining. Cell viability after incubation  
394 on ice was checked after surgery, and no more than 5-10% of cells were found dead after 4 h of  
395 ice-storage.

396 Sprague-Dawley rats weighting 120-140 g (for late-stage CIBP, 14 days post-surgery) or  
397 180-200 g (for early-stage CIBP, 7 days post-surgery), following complete induction of anaesthesia  
398 with isoflurane (induction 5%, maintenance 1.5-2%) in 1 l/min O<sub>2</sub> and subcutaneous perioperative  
399 meloxicam injection (50 µl 2 mg/kg, Metacam®, Boehringer Ingelheim, Berkshire, UK), were  
400 subjected to the surgical procedure of cancer cell implantation into the right tibiae [1]. Briefly, in  
401 aseptic conditions, a small incision was made on a shaved and disinfected area of the tibia's  
402 anterior-medial surface. The tibia was carefully exposed with minimal damage to the surrounding  
403 tissue. Using a 0.7 mm dental drill, a hole was made in the bone through which a thin polyethylene  
404 tube (I.D. 0.28 mm, O.D. 0.61 mm; Intramedic, Becton Dickinson and Co., Sparks, MD, USA) was  
405 inserted 1-1.5 cm into the intramedullary cavity. Using a Hamilton syringe, either 3 × 10<sup>3</sup> MRMT-1  
406 carcinoma cells in 10 µl HBSS or 10 µl HBSS alone (Sham) was injected into the cavity. The tubing  
407 was removed, and the hole plugged with bone restorative material (IRM, Dentsply, Surrey, UK). The  
408 wound was irrigated with saline and closed with Vicryl 4-0 absorbable sutures and wound glue  
409 (VetaBond 3M, UK). The animals were placed in a thermoregulated recovery box until fully awake.

#### 410 4.4. Von Frey behavioural testing

411 Behaviour was assessed 2-4 hours before surgery (day 0) and at 2, 7 and 14 days following  
412 cancer cells injection. Testing was preceded by a 30 min acclimatisation period. Rooms conditions  
413 used for behavioural testing were strictly controlled, maintaining stable levels of humidity (40-50%)  
414 and temperature (22±2°C). Mechanical hypersensitivity was assessed by application of increment  
415 von Frey filaments starting from 0.16 g up to 26 g – cut off (Touch-test, North Coast Medical Inc., San  
416 Jose CA, USA). Each hair was applied 5 times to the plantar surface proximal to the digits of the  
417 ipsilateral and contralateral hind paws. Withdrawal responses and whole paw lifts elicited by von Frey  
418 hairs were scored as positive remark. Five subsequent positive responses to the same filament were  
419 considered as the overall positive reaction, the force of the filament noted, and further testing with  
420 higher force filaments abandoned. Results are presented as a mean ± SEM.

#### 421 4.5. Spinal cord in vivo electrophysiology

422 In vivo electrophysiology was performed on animals weighing 250-300 g as previously described  
423 [15]. Briefly, after induction of anaesthesia, a tracheotomy was performed, and the rat was maintained  
424 with 1.5% of isoflurane in a gaseous mix of N<sub>2</sub>O (66%) and O<sub>2</sub> (33%). A laminectomy was performed  
425 to expose the L3–L5 segments of the spinal cord. Core body temperature was monitored and  
426 maintained at 37°C by a heating blanket unit with rectal probe. Using a parylene-coated, tungsten  
427 electrode (125 µm diameter, 2 MΩ impedance, A-M Systems, Sequim, WA, USA), wide dynamic  
428 range neurons in deep laminae IV/V (~650–900 µm from the dorsal surface of the cord) receiving  
429 afferent A-fibre and C-fibre input from the hind paw were sought by periodic light tapping of the  
430 glabrous surface of the hind paw. Extracellular recordings made from single neurones were  
431 visualized on an oscilloscope and discriminated on a spike amplitude and waveform basis. Sampling  
432 parameters were set as follows: 30-40k amplification (preamp+amp), band-pass filtering between 1k  
433 and 3k Hz and the signal was digitalised at 20 kHz sampling rate. HumBag (Quest Scientific, Canada)  
434 was used to remove low frequency noise (50-60 Hz). Electrical stimulation (NeuroLog system,  
435 Digitimer, UK) was given via two tuberculin needles inserted into the receptive field and a train of 16  
436 stimuli was given (2 ms pulse duration, 0.5 Hz at three times C-fibre threshold: on average  $7.8 \pm 1.5$   
437 mA). Responses evoked by Aβ-, Aδ-, and C-fibres were superimposed and separated according to  
438 latency (0–20 ms, 20–90 ms and 90–300 ms, respectively), on the basis that different fibre types  
439 propagate action potentials at different conduction velocities. Neuronal responses occurring after the  
440 C-fibre latency band of the neuron were classed as post-discharge, a result of repeated stimulation  
441 leading to wind-up neuronal hyperexcitability. The “input” (non-potentiated response) and the  
442 “wind-up” (potentiated response, evident by increased neuronal excitability to repeated stimulation)  
443 were calculated. Input = (action potentials evoked by first pulse at three times C-fibre threshold) ×  
444 total number of pulses. Wind-up = (total action potentials after 16<sup>th</sup> train stimulus at three times C-fibre  
445 threshold) – input. Natural mechanical stimuli, including brush and von Frey filaments (2 g, 8 g, 26 g  
446 and 60 g), were applied to the receptive field for 10 s per stimulus. For each stimulus, the evoked  
447 responses were recorded and quantified as the number of neuronal events counted during the 10 s  
448 duration of a given stimulation. Data were captured and analysed by a CED 1401 interface coupled to  
449 a PC with Spike 2 software (Cambridge Electronic Design, Cambridge, UK; peristimulus time  
450 histogram and rate functions). Stabilization of neuronal responses to the range of electrical and  
451 natural stimuli was confirmed with at least three consistent recordings (<10% variation in the action  
452 potential) to all measures.

#### 453 4.6. Diffuse Noxious Inhibitory Controls

454 Diffuse Noxious Inhibitory Controls (DNIC) were induced analogically to previously published  
455 methodology [9]. Briefly, extracellular recordings were made from 1 WDR neuron per animal by  
456 stimulating the hind paw peripheral receptive field and then repeating in the presence of the ear pinch  
457 (conditioning stimulus - DNIC). The number of action potentials fired in 10 seconds was recorded for  
458 each test. Baseline responses were calculated from the mean of 3 trials. Each trial consisted of  
459 consecutive responses to 8, 26, and 60 g von Frey filaments applied to the hind paw. This was then  
460 followed by consecutive responses to the same mechanical stimuli (8, 26, and 60 g von Frey  
461 filaments) in the presence of DNIC. Precisely, DNIC was induced using a noxious ear pinch (15.75 x  
462 2.3 mm Bulldog Serrefine; InterFocus, Linton, United Kingdom) on the ear ipsilateral to the neuronal  
463 recording, whilst concurrent to this, the peripheral receptive field was stimulated using the von Frey  
464 filaments listed. Diffuse noxious inhibitory control was quantified as an inhibitory effect on neuronal  
465 firing during ear pinch. A minimum 30 s non-stimulation recovery period was allowed between each  
466 test in the trial. A 10-minute non-stimulation recovery period was allowed before the entire process  
467 was repeated for control trial number 2 and 3. The procedure was repeated 3 times and averaged  
468 only when all neurons met the inclusion criteria of 10% variation in action potential firing for all  
469 mechanically evoked neuronal responses.

#### 470 4.7. Immunohistochemistry

471 For tracing of intratibial afferents, rats weighing 60-70 g were anaesthetised using isoflurane  
472 (1.5-2% in oxygen, Piramal, UK) and the left tibia was injected with 5 µl of 4% Fast Blue neuronal  
473 tracer (Polysciences Inc., Germany). After a 7-day recovery period, animals were randomly divided

474 into two groups – sham and cancer. 7 or 14 days after cancer cells inoculation (for early and late stage  
475 respectively), animals were sacrificed by the overdose of pentobarbital and transcardially perfused  
476 with cold PBS followed by 4% PFA in phosphate buffer (pH 7.5). Next L2-L5 ipsi/contra DRG were  
477 collected, post-fixed in 4% PFA, cryo-sectioned and incubated with primary antibodies against Atf3  
478 (rabbit, 1:200, Santa Cruz, (C-19): sc-188, US) and Tub $\beta$ III (mouse, 1:1000, G712A, Promega, UK).  
479 Slides were then incubated with the appropriate fluorophore-conjugated secondary antibodies.  
480 Representative samples were imaged with a LSM 710 laser-scanning confocal microscope (Zeiss)  
481 using 10x (0.3 NA) and 20 x (0.8 NA) dry objectives and analysed with Fiji Win 64. For quantification,  
482 samples were imaged with 20x dry objective on Zeiss Imager Z1 microscope coupled with AxioCam  
483 MRm CCD camera. The acquisition of images was made in multidimensional mode and the MosaiX  
484 function was used to construct the full view. 3 DRG were imaged per lumbar region. Cell counting was  
485 carried out on the Fiji Win 64 utilising cell counter plugin. For Atf3 analysis, cells were counted as  
486 positive only when the cell's nucleus was stained. The percentage of Atf3 positive cells relative to the  
487 total number of neurons (Tub $\beta$ III) and FB positivity was calculated. On average, 4-20 DRG sections  
488 (depending on the DRG size) were imaged for quantification. 3 rats per group were used for those  
489 experiments and no other procedure was performed on those animals to prevent unspecific activation  
490 of Atf3.

#### 491 *4.8. Micro-computed tomography of cancer-bearing legs*

492 Rat tibiae, cleared of excess muscle and soft tissue, were placed into a micro-computed  
493 tomography scanner ( $\mu$ CT, Skyscan1172) with Hamamatsu 10 Mp camera. Recording parameters  
494 were set as follows: source voltage at 40 kV, source current at 250  $\mu$ A, rotation step at 0.600 deg, with  
495 2 frames averaging and 0.5 mm aluminium filter. For reconstruction NRecon software (version:  
496 1.6.10.4) was used. In total, over 500, 34  $\mu$ m thick virtual slices were collected per bone. Cancer  
497 growth encompassed an area proximal to the tibial knee head and 114 scan planes covered the  
498 majority of the tumour mass (for analysis details see [2]). Representative visualisations were  
499 prepared with Fiji with 3D viewer plugin.

#### 500 *4.9. Quantification and statistical analysis*

501 Statistical analyses were performed using SPSS v25 (IBM, Armonk, NY). All data plotted in  
502 represent mean  $\pm$  SEM. Throughout the manuscript 'n' refers to the number of animals tested.  
503 Detailed description of the number of samples analysed and their meanings, together with values  
504 obtained from statistical tests can be found in each figure legend. Symbols denoting statistically  
505 significant differences were also explained in each figure legend. Main effects from ANOVAs are  
506 expressed as an F-statistic and p-value within brackets. Throughout, p-value below 0.05 was  
507 considered significant. Behaviour: Two-Way RM-ANOVA with Bonferroni post-hoc test was used to  
508 analyse behavioural data for von Frey. Electrophysiology: One-way ANOVA with Bonferroni post hoc  
509 test was used to assess significance for baseline electrical and brush. Von Frey responses were  
510 assessed with RM-ANOVA with the Bonferroni post-hoc. Statistical differences in the neuronal  
511 responses observed after ear pinch were determined using a 2-way repeated-measures analysis of  
512 variance (RM-ANOVA) with Bonferroni post hoc test. One-way ANOVA with Tukey post-hoc  
513 performed in the GraphPad Prism was used to analyse immunohistochemical data.

## 514 **5. Conclusions**

515 The overarching aim of the present study was to link previous reports of peripheral sensitization  
516 to central (spinal) events. Changes in the peripheral nervous system reflect a notable impact on  
517 spinal neuronal responses in the early stage of CIBP, and this is mechanistically linked to  
518 dysfunctionality of the descending inhibitory 'DNIC' pathway. The data herein provide insight  
519 regarding the stage specific plasticity in central modulatory processes that underlie the pain  
520 phenotype in this particular rodent model of CIBP.

521 **Supplementary Materials: Figure S1:** Detailed Atf3 quantification in separate dorsal root ganglia, **Movie S1:**  
522 3D-rendered micro-computed tomography scans of rat's tibiae in health and in the presence of bone cancer  
523 (early and late stage). Scale bar 1 mm.

524 **Author Contributions:** Conceptualization, M.W.K., K.B., A.H.D.; methodology, M.W.K., K.B.; formal analysis,  
525 M.W.K., D.D.; investigation, M.W.K., D.D., K.B.; resources, K.B., A.H.D.; data curation, M.W.K.; writing—original  
526 draft preparation, M.W.K., K.B.; writing—review and editing, M.W.K., K.B.; visualization, M.W.K.; supervision,  
527 M.W.K., K.B., A.H.D.; project administration, K.B., A.H.D.; funding acquisition, K.B., A.H.D. All authors have read  
528 and agreed to the published version of the manuscript.

529 **Funding:** This work was supported by a grant from the European Union's Horizon 2020 research and innovation  
530 programme under the Marie Skłodowska-Curie grant agreement No.642720, and by The Academy of Medical  
531 Sciences Springboard Award (SBF004\1064).

532 **Acknowledgments:** We would like to acknowledge Professor Timothy Arnett (UCL) for the use of the  $\mu$ CT  
533 scanner, and Professor Stephen McMahon (KCL) for the use of the immunohistochemistry equipment.

534 **Conflicts of Interest:** The authors declare no conflict of interest.

## 535 References

- 536 1. Medhurst, S.J.; Walker, K.; Bowes, M.; Kidd, B.L.; Glatt, M.; Muller, M.; Hattenberger, M.; Vaxelaire, J.;  
537 O'Reilly, T.; Wotherspoon, G.; et al. A rat model of bone cancer pain. *Pain* **2002**, *96*, 129–40,  
538 doi:10.1016/S0304-3959(01)00437-7.
- 539 2. Kucharczyk, M.W.; Chisholm, K.I.; Denk, F.; Dickenson, A.H.; Bannister, K.; McMahon, S.B. The impact of  
540 bone cancer on the peripheral encoding of mechanical pressure stimuli. *Pain* **2020**,  
541 doi:10.1097/j.pain.0000000000001880.
- 542 3. Donovan-Rodriguez, T.; Dickenson, A.H.; Urch, C.E. Superficial dorsal horn neuronal responses and the  
543 emergence of behavioural hyperalgesia in a rat model of cancer-induced bone pain. *Neurosci. Lett.* **2004**,  
544 *360*, 29–32, doi:10.1016/j.neulet.2004.01.048.
- 545 4. Donovan-Rodriguez, T.; Urch, C.E.; Dickenson, A.H. Evidence of a role for descending serotonergic  
546 facilitation in a rat model of cancer-induced bone pain. *Neurosci. Lett.* **2006**, *393*, 237–242,  
547 doi:10.1016/j.neulet.2005.09.073.
- 548 5. Urch, C.E.; Donovan-Rodriguez, T.; Dickenson, A.H. Alterations in dorsal horn neurones in a rat model of  
549 cancer-induced bone pain. *Pain* **2003**, *106*, 347–356, doi:10.1016/j.pain.2003.08.002.
- 550 6. Falk, S.; Patel, R.; Heegaard, a.; Mercadante, S.; Dickenson, a. H. Spinal neuronal correlates of  
551 tapentadol analgesia in cancer pain: A back-translational approach. *Eur. J. Pain* **2015**, *19*, 152–158,  
552 doi:10.1002/ejp.530.
- 553 7. Le Bars, D.; Dickenson, A.H.; Besson, J.M. Diffuse noxious inhibitory controls (DNIC). I. Effects on dorsal  
554 horn convergent neurones in the rat. *Pain* **1979**, *6*, 283–304, doi:10.1016/0304-3959(79)90049-6.
- 555 8. Bouhassira, D.L.B.D.V.L.W.J.C. Inhibitory Controls Noxious Diffuse ( DNIC ) in Animals and in Man. *Patol.*  
556 *Fiziol. Eksp. Ter* **1992**, 55–65.
- 557 9. Bannister, K.; Patel, R.; Goncalves, L.; Townson, L.; Dickenson, A.H. Diffuse noxious inhibitory controls  
558 and nerve injury: restoring an imbalance between descending monoamine inhibitions and facilitations. *Pain*  
559 **2015**, *156*, 1803–11, doi:10.1097/j.pain.0000000000000240.
- 560 10. Lockwood, S.M.; Bannister, K.; Dickenson, A.H. An investigation into the noradrenergic and serotonergic  
561 contributions of diffuse noxious inhibitory controls in a monoiodoacetate model of osteoarthritis. *J.*  
562 *Neurophysiol.* **2019**, *121*, 96–104, doi:10.1152/jn.00613.2018.
- 563 11. Lewis, G.N.; Heales, L.; Rice, D.A.; Rome, K.; McNair, P.J. Reliability of the conditioned pain modulation  
564 paradigm to assess endogenous inhibitory pain pathways. *Pain Res. Manag.* **2012**, *17*, 98–102.
- 565 12. Yarnitsky, D.; Granot, M.; Nahman-Averbuch, H.; Khamaisi, M.; Granovsky, Y. Conditioned pain  
566 modulation predicts duloxetine efficacy in painful diabetic neuropathy. *Pain* **2012**, *153*, 1193–8,  
567 doi:10.1016/j.pain.2012.02.021.
- 568 13. Cummins, T.M.; Kucharczyk, M.; Graven-Nielsen, T.; Bannister, K. Activation of the descending pain  
569 modulatory system using cuff pressure algometry: Back translation from man to rat. *Eur. J. Pain* **2020**,  
570 doi:10.1002/ejp.1580.
- 571 14. Zimmermann, M. Ethical guidelines for investigations of experimental pain in conscious animals. *Pain*  
572 **1983**, *16*, 109–10, doi:10.1016/0304-3959(83)90201-4.
- 573 15. Urch, C.E.; Dickenson, a. H. In vivo single unit extracellular recordings from spinal cord neurones of rats.  
574 *Brain Res. Protoc.* **2003**, *12*, 26–34, doi:10.1016/S1385-299X(03)00068-0.
- 575 16. Kaan, T.K.Y.; Yip, P.K.; Patel, S.; Davies, M.; Marchand, F.; Cockayne, D. a.; Nunn, P. a.; Dickenson, A.H.;  
576 Ford, A.P.D.W.; Zhong, Y.; et al. Systemic blockade of P2X3 and P2X2/3 receptors attenuates bone cancer  
577 pain behaviour in rats. *Brain* **2010**, *133*, 2549–64, doi:10.1093/brain/awq194.

- 578 17. Peters, C.M.; Ghilardi, J.R.; Keyser, C.P.; Kubota, K.; Lindsay, T.H.; Luger, N.M.; Mach, D.B.; Schwei, M.J.;  
579 Sevcik, M.A.; Mantyh, P.W. Tumor-induced injury of primary afferent sensory nerve fibers in bone cancer  
580 pain. *Exp. Neurol.* **2005**, *193*, 85–100, doi:10.1016/j.expneurol.2004.11.028.
- 581 18. Urch, C.E.; Donovan-Rodriguez, T.; Gordon-Williams, R.; Bee, L.A.; Dickenson, A.H. Efficacy of chronic  
582 morphine in a rat model of cancer-induced bone pain: Behavior and in dorsal horn pathophysiology. *J. Pain*  
583 **2005**, *6*, 837–845, doi:10.1016/j.jpain.2005.08.005.
- 584 19. Donovan-Rodriguez, T.; Dickenson, A.H.; Urch, C.E. Gabapentin normalizes spinal neuronal responses  
585 that correlate with behavior in a rat model of cancer-induced bone pain. *Anesthesiology* **2005**, *102*, 132–40.
- 586 20. Prato, V.; Taberner, F.J.; Hockley, J.R.F.; Callejo, G.; Arcourt, A.; Tazir, B.; Hammer, L.; Schad, P.;  
587 Heppenstall, P.A.; Smith, E.S.; et al. Functional and Molecular Characterization of Mechanoinsensitive  
588 “Silent” Nociceptors. *Cell Rep.* **2017**, *21*, 3102–3115, doi:10.1016/j.celrep.2017.11.066.
- 589 21. Nencini, S.; Ivanusic, J. Mechanically sensitive A $\delta$  nociceptors that innervate bone marrow respond to  
590 changes in intra-osseous pressure. *J. Physiol.* **2017**, *595*, 4399–4415, doi:10.1113/JP273877.
- 591 22. Nencini, S.; Ringuet, M.; Kim, D.-H.; Chen, Y.-J.; Greenhill, C.; Ivanusic, J.J. Mechanisms of nerve growth  
592 factor signaling in bone nociceptors and in an animal model of inflammatory bone pain. *Mol. Pain* **2017**, *13*,  
593 174480691769701, doi:10.1177/1744806917697011.
- 594 23. Ivanusic, J.J. Size, neurochemistry, and segmental distribution of sensory neurons innervating the rat tibia.  
595 *J. Comp. Neurol.* **2009**, *517*, 276–283, doi:10.1002/cne.22160.
- 596 24. Magerl, W.; Fuchs, P.N.; Meyer, R.A.; Treede, R.-D. Roles of capsaicin-insensitive nociceptors in  
597 cutaneous pain and secondary hyperalgesia. *Brain* **2001**, *124*, 1754–1764, doi:10.1093/brain/124.9.1754.
- 598 25. Todd, A.J. Neuronal circuitry for pain processing in the dorsal horn. *Nat. Rev. Neurosci.* **2010**, *11*, 823–36,  
599 doi:10.1038/nrn2947.
- 600 26. Sivilotti, L.; Woolf, C.J. The contribution of GABAA and glycine receptors to central sensitization:  
601 disinhibition and touch-evoked allodynia in the spinal cord. *J. Neurophysiol.* **1994**, *72*, 169–79,  
602 doi:10.1152/jn.1994.72.1.169.
- 603 27. Yarnitsky, D. Conditioned pain modulation (the diffuse noxious inhibitory control-like effect): Its relevance  
604 for acute and chronic pain states. *Curr. Opin. Anaesthesiol.* **2010**, *23*, 611–615,  
605 doi:10.1097/ACO.0b013e32833c348b.
- 606 28. Yarnitsky, D.; Arendt-Nielsen, L.; Bouhassira, D.; Edwards, R.R.; Fillingim, R.B.; Granot, M.; Hansson, P.;  
607 Lautenbacher, S.; Marchand, S.; Wilder-Smith, O. Recommendations on terminology and practice of  
608 psychophysical DNIC testing. *Eur. J. Pain* **2010**, *14*, 339, doi:10.1016/j.ejpain.2010.02.004.
- 609 29. Kosek, E.; Ordeberg, G. Lack of pressure pain modulation by heterotopic noxious conditioning stimulation  
610 in patients with painful osteoarthritis before, but not following, surgical pain relief. *Pain* **2000**, *88*, 69–78.
- 611 30. Skovbjerg, S.; Jørgensen, T.; Arendt-Nielsen, L.; Ebstrup, J.F.; Carstensen, T.; Graven-Nielsen, T.  
612 Conditioned Pain Modulation and Pressure Pain Sensitivity in the Adult Danish General Population: The  
613 DanFunD Study. *J. Pain* **2017**, *18*, 274–284.
- 614 31. Perrotta, A.; Serrao, M.; Ambrosini, A.; Bolla, M.; Coppola, G.; Sandrini, G.; Pierelli, F. Facilitated temporal  
615 processing of pain and defective supraspinal control of pain in cluster headache. *Pain* **2013**, *154*, 1325–32,  
616 doi:10.1016/j.pain.2013.04.012.
- 617 32. de Clauser, L.; Luiz, A.P.; Santana-Varela, S.; Wood, J.N.; Sikandar, S. Sensitization of cutaneous primary  
618 afferents in bone cancer revealed by &lt;em>in vivo</em> calcium imaging. *bioRxiv* **2020**,  
619 2020.09.01.275099, doi:10.1101/2020.09.01.275099.
- 620 33. Falk, S.; Schwab, S.D.; Frøsig-Jørgensen, M.; Clausen, R.P.; Dickenson, A.H.; Heegaard, A.-M. P2X7  
621 receptor-mediated analgesia in cancer-induced bone pain. *Neuroscience* **2015**, *291*, 93–105,  
622 doi:10.1016/j.neuroscience.2015.02.011.
- 623 34. Jimenez-Andrade, J.M.; Bloom, A.P.; Mantyh, W.G.; Koewler, N.J.; Freeman, K.T.; Delong, D.; Ghilardi,  
624 J.R.; Kuskowski, M.A.; Mantyh, P.W. Capsaicin-sensitive sensory nerve fibers contribute to the generation  
625 and maintenance of skeletal fracture pain. *Neuroscience* **2009**, *162*, 1244–54,  
626 doi:10.1016/j.neuroscience.2009.05.065.
- 627 35. Mantyh, W.G.; Jimenez-Andrade, J.M.; Stake, J.I.; Bloom, A.P.; Kaczmarek, M.J.; Taylor, R.N.; Freeman,  
628 K.T.; Ghilardi, J.R.; Kuskowski, M.A.; Mantyh, P.W. Blockade of nerve sprouting and neuroma formation  
629 markedly attenuates the development of late stage cancer pain. *Neuroscience* **2010**, *171*, 588–598,  
630 doi:10.1016/j.neuroscience.2010.08.056.



- 631 36. Bloom, A.P.; Jimenez-Andrade, J.M.; Taylor, R.N.; Castañeda-Corral, G.; Kaczmariska, M.J.; Freeman,  
632 K.T.; Coughlin, K.A.; Ghilardi, J.R.; Kuskowski, M.A.; Mantyh, P.W. Breast cancer-induced bone  
633 remodeling, skeletal pain, and sprouting of sensory nerve fibers. *J. Pain* **2011**, *12*, 698–711,  
634 doi:10.1016/j.jpain.2010.12.016.
- 635 37. Jimenez-Andrade, J.M.; Bloom, a. P.; Stake, J.I.; Mantyh, W.G.; Taylor, R.N.; Freeman, K.T.; Ghilardi,  
636 J.R.; Kuskowski, M. a.; Mantyh, P.W. Pathological Sprouting of Adult Nociceptors in Chronic Prostate  
637 Cancer-Induced Bone Pain. *J. Neurosci.* **2010**, *30*, 14649–14656,  
638 doi:10.1523/JNEUROSCI.3300-10.2010.
- 639 38. Mantyh, P.W. Cancer pain and its impact on diagnosis, survival and quality of life. *Nat. Rev. Neurosci.*  
640 **2006**, *7*, 797–809, doi:10.1038/nrn1914.
- 641 39. Ghilardi, J.R.; Freeman, K.T.; Jimenez-Andrade, J.M.; Mantyh, W.G.; Bloom, A.P.; Bouhana, K.S.;  
642 Trollinger, D.; Winkler, J.; Lee, P.; Andrews, S.W.; et al. Sustained blockade of neurotrophin receptors  
643 TrkA, TrkB and TrkC reduces non-malignant skeletal pain but not the maintenance of sensory and  
644 sympathetic nerve fibers. *Bone* **2011**, *48*, 389–98, doi:10.1016/j.bone.2010.09.019.
- 645 40. Jimenez-Andrade, J.M.; Ghilardi, J.R.; Castañeda-Corral, G.; Kuskowski, M.A.; Mantyh, P.W. Preventive or  
646 late administration of anti-NGF therapy attenuates tumor-induced nerve sprouting, neuroma formation, and  
647 cancer pain. *Pain* **2011**, *152*, 2564–74, doi:10.1016/j.pain.2011.07.020.
- 648 41. McCaffrey, G.; Thompson, M.L.; Majuta, L.; Fealk, M.N.; Chartier, S.; Longo, G.; Mantyh, P.W. NGF  
649 blockade at early times during bone cancer development attenuates bone destruction and increases limb  
650 use. *Cancer Res.* **2014**, *74*, 7014–7023, doi:10.1158/0008-5472.CAN-14-1220.
- 651 42. Boilly, B.; Faulkner, S.; Jobling, P.; Hondermarck, H. Nerve Dependence: From Regeneration to Cancer.  
652 *Cancer Cell* **2017**, *31*, 342–354.
- 653 43. Hayakawa, Y.; Sakitani, K.; Konishi, M.; Asfaha, S.; Niikura, R.; Tomita, H.; Renz, B.W.; Tailor, Y.;  
654 Macchini, M.; Middelhoff, M.; et al. Nerve Growth Factor Promotes Gastric Tumorigenesis through Aberrant  
655 Cholinergic Signaling. *Cancer Cell* **2017**, *31*, 21–34, doi:10.1016/j.ccell.2016.11.005.
- 656 44. Toda, M.; Suzuki, T.; Hosono, K.; Hayashi, I.; Hashiba, S.; Onuma, Y.; Amano, H.; Kurihara, Y.; Kurihara,  
657 H.; Okamoto, H.; et al. Neuronal system-dependent facilitation of tumor angiogenesis and tumor growth by  
658 calcitonin gene-related peptide. *Proc Natl Acad Sci U S A* **2008**, *105*, 13550–13555,  
659 doi:10.1073/pnas.0800767105.
- 660 45. Mantyh, P.W.; Clohisy, D.R.; Koltzenburg, M.; Hunt, S.P. Molecular mechanisms of cancer pain. *Nat. Rev.*  
661 *Cancer* **2002**, *2*, 201–209, doi:10.1038/nrc747.
- 662 46. Ghilardi, J.R.; Freeman, K.T.; Jimenez-Andrade, J.M.; Mantyh, W.G.; Bloom, A.P.; Kuskowski, M.A.;  
663 Mantyh, P.W. Administration of a Tropomyosin Receptor Kinase Inhibitor Attenuates Sarcoma-Induced  
664 Nerve Sprouting, Neuroma Formation and Bone Cancer Pain. *Mol. Pain* **2010**, *6*, 1744-8069-6–87,  
665 doi:10.1186/1744-8069-6-87.
- 666 47. Abraira, V.E.; Kuehn, E.D.; Chirila, A.M.; Springel, M.W.; Toliver, A.A.; Zimmerman, A.L.; Orefice, L.L.;  
667 Boyle, K.A.; Bai, L.; Song, B.J.; et al. The Cellular and Synaptic Architecture of the Mechanosensory Dorsal  
668 Horn. *Cell* **2017**, *168*, 295-310.e19, doi:10.1016/j.cell.2016.12.010.
- 669 48. Usoskin, D.; Furlan, A.; Islam, S.; Abdo, H.; Lönnnerberg, P.; Lou, D.; Hjerling-Leffler, J.; Haeggström, J.;  
670 Kharchenko, O.; Kharchenko, P. V.; et al. Unbiased classification of sensory neuron types by large-scale  
671 single-cell RNA sequencing. *Nat. Neurosci.* **2014**, *18*, 145–153, doi:10.1038/nn.3881.
- 672 49. Pertovaara, A. Noradrenergic pain modulation. *Prog. Neurobiol.* **2006**, *80*, 53–83,  
673 doi:10.1016/j.pneurobio.2006.08.001.
- 674 50. Rajaofetra, N.; Poulat, P.; Marlier, L.; Geffard, M.; Privat, A. Pre- and postnatal development of  
675 noradrenergic projections to the rat spinal cord: an immunocytochemical study. *Dev. Brain Res.* **1992**, *67*,  
676 237–246, doi:10.1016/0165-3806(92)90224-K.
- 677 51. Zoli, M.; Agnati, L.F. Wiring and volume transmission in the central nervous system: The concept of closed  
678 and open synapses. *Prog. Neurobiol.* **1996**, *49*, 363–380, doi:10.1016/S0301-0082(96)00020-2.
