# Supplementary material for: The stage specific plasticity of descending modulatory controls in a rodent model of cancer induced bone pain
Source: bioRxiv or medRxiv preprint supplement (doi:10.1101/2020.09.29.319186), 2020-10-01
Supplement: Supplementary file [file media-2.pdf]

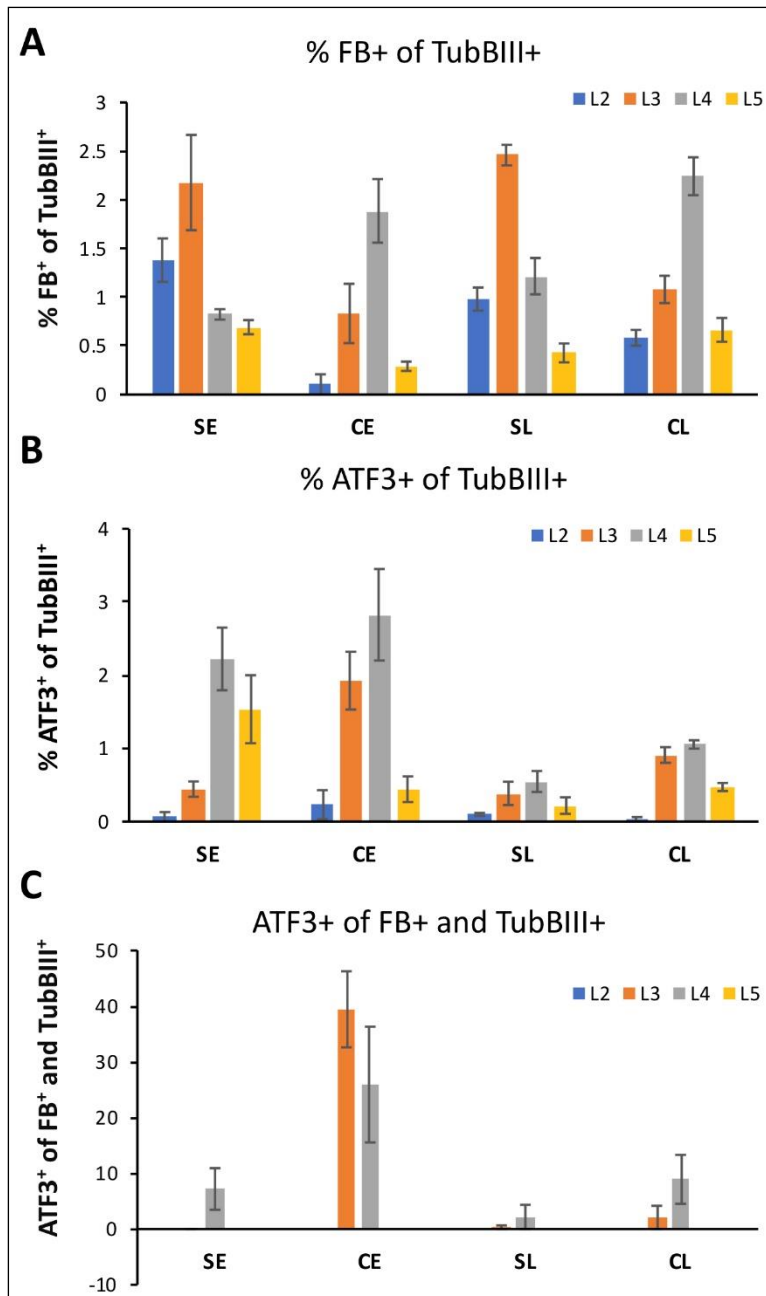

**Figure S1: Detailed Atf3 quantification in separate dorsal root ganglia. (A)** Total number of Fast Blue (FB) traced tibial afferents within ipsilateral L2-5 DRG analysed as a percentage of all neurons (Tubullin- $\beta$ III) therein. On average  $100.6 \pm 15.7$  L2-5 DRG neurons innervate tibia. No FB positivity was noticed in the contralateral lumbar DRG (not shown). **(B)** Quantification of all Atf3<sup>+</sup> afferents within ipsilateral L2-5 DRG, analysed as a percentage of all neurons (Tubullin- $\beta$ III) therein in cancer early (CE, day 7/8) and cancer late (CL, day 14/15) stage groups with corresponding sham groups (early – SE and late – SL). **(C)** Quantification of Atf3<sup>+</sup> afferents within ipsilateral L2-5 DRG analysed as a percentage of all FB traced neurons. On average 4-20 10  $\mu$ m sections were counted per DRG. Data represent the mean  $\pm$  SEM ( $n = 3$ , 'n' denotes a separate animal).
